# Supplementary material for: Integrated Analysis of Gene Expression and Tumor Nuclear Image Profiles Associated with Chemotherapy Response in Serous Ovarian Carcinoma
Source: PLOS journal article supplement (doi:10.1371/journal.pone.0036383), 2012-05-08
Supplement: S5 (10.1371/journal.pone.0036383.s005) [file journal.pone.0036383.s005]

### Training Set (n = 130)

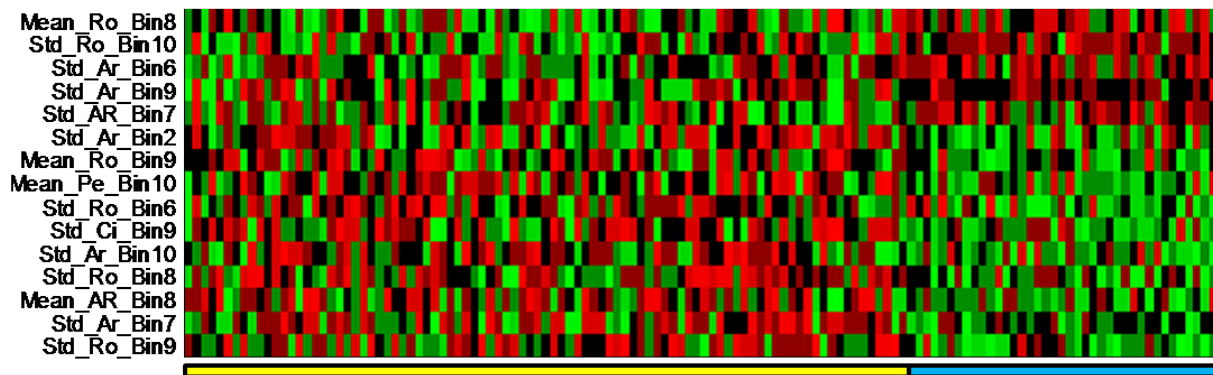

### Test Set (n = 123)

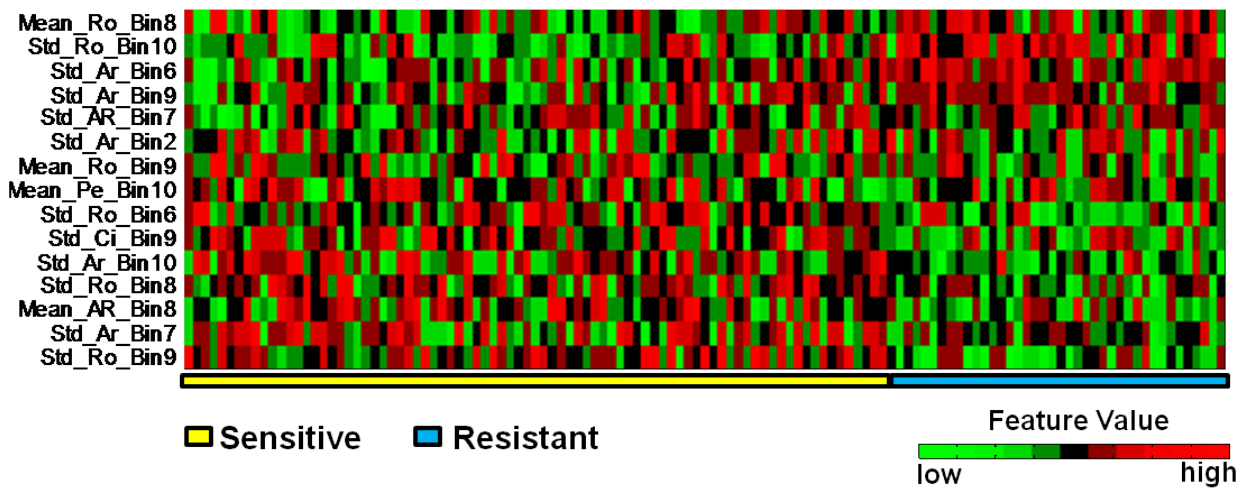

**Figure S5.** Detailed version of Figure 3A including morphologic feature names.
