# Supplementary material for: Integrated Analysis of Gene Expression and Tumor Nuclear Image Profiles Associated with Chemotherapy Response in Serous Ovarian Carcinoma
Source: PLOS journal article supplement (doi:10.1371/journal.pone.0036383), 2012-05-08
Supplement: S7 (10.1371/journal.pone.0036383.s007) [file journal.pone.0036383.s007]

**Table S2.** Clinicopathologic characteristics of patients in the TCGA and Australia Validation data sets.

|                                         | TCGA Valuation Set |               |              | Australian Validation Set |               |              |
|-----------------------------------------|--------------------|---------------|--------------|---------------------------|---------------|--------------|
|                                         | Group with HS      | Group with LS | Totals (All) | Group with HS             | Group with LS | Totals (All) |
| <b>No. of patients</b>                  | 185                | 43            | 228          | 171                       | 73            | 244          |
| <b>Age</b>                              |                    |               |              |                           |               |              |
| <b>Mean, yrs [SD]</b>                   | 60.7 [11.2]        | 59.4 [12.7]   | 60.5 [11.5]  | 60.6 [10.4]               | 59.3 [10.6]   | 60.2 [10.4]  |
| <b>Range</b>                            | 27.2 – 85.5        | 37.3 – 82.8   | 27.2 – 85.5  | 22 - 80                   | 23 - 80       | 22 - 80      |
| <b>FIGO Stage<sup>¶</sup></b>           |                    |               |              |                           |               |              |
| <b>I</b>                                | 0                  | 0             | 0            | 11                        | 5             | 16           |
| <b>II</b>                               | 9                  | 1             | 10           | 9                         | 0             | 9            |
| <b>III</b>                              | 141                | 33            | 174          | 140                       | 58            | 198          |
| <b>IV</b>                               | 31                 | 9             | 40           | 11                        | 10            | 21           |
| <b>Unknown</b>                          | 4                  | 0             | 4            | 0                         | 0             | 0            |
| <b>WHO Grade</b>                        |                    |               |              |                           |               |              |
| <b>2</b>                                | 15                 | 5             | 20           | 59                        | 29            | 88           |
| <b>3</b>                                | 165                | 37            | 202          | 111                       | 43            | 154          |
| <b>Unknown</b>                          | 5                  | 1             | 6            | 1                         | 1             | 2            |
| <b>Surgical outcome<sup>§</sup></b>     |                    |               |              |                           |               |              |
| <b>Optimal (<math>\leq 1</math> cm)</b> | 77                 | 26            | 103          | 52                        | 20            | 72           |
| <b>Suboptimal (&gt; 1cm)</b>            | 46                 | 10            | 56           | 42                        | 22            | 62           |
| <b>No macroscopic disease</b>           | 31                 | 6             | 37           | 77                        | 31            | 108          |
| <b>Unknown</b>                          | 31                 | 1             | 32           | 0                         | 0             | 0            |
| <b>Vital status</b>                     |                    |               |              |                           |               |              |
| <b>Alive</b>                            | 97                 | 21            | 118          | 107                       | 28            | 135          |
| <b>Dead</b>                             | 84                 | 22            | 106          | 64                        | 45            | 109          |
| <b>Unknown</b>                          | 4                  | 0             | 4            | 0                         | 0             | 0            |
| <b>Recurrent disease<sup>§</sup></b>    |                    |               |              |                           |               |              |
| <b>Yes</b>                              | 95                 | 27            | 122          | 57                        | 11            | 68           |
| <b>No</b>                               | 88                 | 16            | 104          | 114                       | 62            | 176          |
| <b>Unknown</b>                          | 2                  | 0             | 2            | 0                         | 0             | 0            |

Abbreviations: TCGA, The Cancer Genome Atlas; SD, standard deviation; SE, standard error. HS, high-score; LS, low-score

<sup>¶</sup>: Cases were staged according to the 1988 FIGO staging system.

<sup>§</sup>: Surgical outcome was defined as the size of residual disease at the conclusion of the primary surgical procedure. This field was used to define surgical cytoreduction as optimal or suboptimal. Optimal was defined as no residual disease greater than 1cm and included the variable categories of no macroscopic disease (*i.e.* microscopic residual disease) and 1 to 10mm. Suboptimal was defined as residual disease greater than 1cm and included the variable categories of 11 to 20mm and greater than 20mm.

<sup>§</sup>: Local recurrence after the date of initial surgical resection.
