# Supplementary material for: Integrated Analysis of Gene Expression and Tumor Nuclear Image Profiles Associated with Chemotherapy Response in Serous Ovarian Carcinoma
Source: PLOS journal article supplement (doi:10.1371/journal.pone.0036383), 2012-05-08
Supplement: S9 (10.1371/journal.pone.0036383.s009) [file journal.pone.0036383.s009]

**Table S4.** The 15 morphologic features are differentially varied between chemoresistant and chemosensitive patients with serous OvCa ( $FDR \leq 2\%$ ).

| Features      | Description                                  | Feature in Resistant Group ( $FDR^*$ ) |
|---------------|----------------------------------------------|----------------------------------------|
| Std_Ro_Bin9   | Standard deviation of roundness in Bin 9     | Decreased (1.5E-04)                    |
| Std_Ar_Bin7   | Standard deviation of area in Bin 7          | Decreased (5.4E-03)                    |
| Mean_AR_Bin8  | Average aspect ratio in Bin 8                | Decreased (5.4E-03)                    |
| Std_Ro_Bin8   | Standard deviation of roundness in Bin 8     | Decreased (1.3E-02)                    |
| Std_Ar_Bin10  | Standard deviation of area in Bin 10         | Decreased (1.3E-02)                    |
| Std_Ci_Bin9   | Standard deviation of circularity in Bin 9   | Decreased (1.3E-02)                    |
| Std_Ro_Bin6   | Standard deviation of roundness in Bin 6     | Decreased (1.3E-02)                    |
| Mean_Pe_Bin10 | Average perimeter in Bin 10                  | Decreased (1.3E-02)                    |
| Mean_Ro_Bin9  | Average roundness in Bin 9                   | Decreased (1.7E-02)                    |
| Std_Ar_Bin2   | Standard deviation of area in Bin 2          | Decreased (1.8E-02)                    |
| Std_AR_Bin7   | Standard deviation of aspect ration in Bin 7 | Increased (2.0E-02)                    |
| Std_Ar_Bin9   | Standard deviation of area in Bin 9          | Increased (1.6E-02)                    |
| Std_Ar_Bin6   | Standard deviation of area in Bin 6          | Increased (5.4E-03)                    |
| Std_Ro_Bin10  | Standard deviation of roundness in Bin 10    | Increased (5.4E-03)                    |
| Mean_Ro_Bin8  | Average roundness in Bin 8                   | Increased (5.4E-03)                    |

\* $FDR$  is the feature value difference between the chemosensitive and chemoresistant samples in the training set, as identified by parametric t-test combined with Benjamini-Hochberg multiple testing.
