# Supplementary material for: Integrated Analysis of Gene Expression and Tumor Nuclear Image Profiles Associated with Chemotherapy Response in Serous Ovarian Carcinoma
Source: PLOS journal article supplement (doi:10.1371/journal.pone.0036383), 2012-05-08
Supplement: S10 (10.1371/journal.pone.0036383.s010) [file journal.pone.0036383.s010]

**Table S5.** Image features defined for tumor nuclear image profile generation<sup>£</sup>.

| Features                  |                          | Area* | Perimeter <sup>†</sup> | Circularity <sup>‡</sup> | AR <sup>§</sup> | Roundness <sup>  </sup> | Solidity <sup>¶</sup> |
|---------------------------|--------------------------|-------|------------------------|--------------------------|-----------------|-------------------------|-----------------------|
| overall                   | Mean                     | √     | √                      | √                        | √               | √                       | √                     |
|                           | SD                       | √     | √                      | √                        | √               | √                       | √                     |
| Bin** 1                   | Mean                     | √     | √                      | √                        | √               | √                       | √                     |
|                           | SD                       | √     | √                      | √                        | √               | √                       | √                     |
|                           | Percentage <sup>††</sup> | √     | NA                     | NA                       | NA              | NA                      | NA                    |
|                           | Count <sup>‡‡</sup>      | √     | NA                     | NA                       | NA              | NA                      | NA                    |
| .                         | .                        | .     | .                      | .                        | .               | .                       | .                     |
| .                         | .                        | .     | .                      | .                        | .               | .                       | .                     |
| .                         | .                        | .     | .                      | .                        | .               | .                       | .                     |
| Bin 10                    | Mean                     | √     | √                      | √                        | √               | √                       | √                     |
|                           | SD                       | √     | √                      | √                        | √               | √                       | √                     |
|                           | Percentage               | √     | NA                     | NA                       | NA              | NA                      | NA                    |
|                           | Count                    | √     | NA                     | NA                       | NA              | NA                      | NA                    |
| Compactness <sup>§§</sup> |                          | √     | NA                     | NA                       | NA              | NA                      | NA                    |

Abbreviations: AR, aspect ratio; √, feature for the parameter is calculated; SD, standard deviation; NA, feature for the parameter is not applicable.

£: The nuclear parameters such as area, perimeter, circularity, AR, roundness and solidity are automatically measured using ImageJ Plugins.

\*: Area (A) was calculated as the nucleus size in pixels.

†: Perimeter (C) was calculated as the length of the outside boundary of the nucleus.

‡: Circularity was calculated as  $4\pi A/C^2$ .

§: AR was calculated as  $major\_axis/minor\_axis$ .

||: Roundness was calculated as  $4A/(\pi \times major\_axis^2)$ .

¶: Solidity was calculated as a ratio of the nucleus size to its convex area.

\*\* : Bins were determined based on the nucleus size.

††: Percentage was calculated as a ratio of the number of nuclei in a bin versus in all bins.

‡‡: Count was calculated as the total number of nuclei in a bin.

§§ : Compactness was calculated as a ratio of total number of nuclei to the number of views per sample.
